33 Dear Editor,

34

35 Legume/cereal intercropping systems have been regarded as the practical  
36 application of basic ecological principles such as diversity, competition and  
37 facilitation. In a recent PNAS paper, Li et al. (1) describe the novel finding that  
38 maize exudates promote faba bean nodulation and nitrogen fixation by  
39 upregulating genes involved in (iso)flavonoids synthesis (chalcone–flavanone  
40 isomerase) within faba bean, resulting in production of more genistein, a  
41 legume-to-rhizobia signal during establishment of the faba bean N<sub>2</sub>-fixing  
42 symbiosis. Although we salute the authors' methodological efforts, there is  
43 another mechanism that could be responsible for the effect of corn root exudates  
44 on faba bean nitrogen fixation observed in this article (1). The authors may  
45 misunderstand their data and the signalling role of maize exudates, thus got a  
46 defective model for the root interactions between faba bean and maize.

47

48 In their study, to explore the potential influence of maize exudates on the  
49 rhizobia physiological status, Li et al. (1) performed rhizobial growth curve by  
50 adding root exudates from maize and found no obvious affect. However, they  
51 did not check the possible effect of maize root exudates on the synthesis of Nod-  
52 factor. Previous data have showed that root washings and extracts from maize  
53 roots could directly induce the synthesis of Nod factor-like lipo-  
54 chitooligosaccharides (LCOs) of rhizobia in vitro (2). The amount of LCOs  
55 secreted by rhizobia cultured with root extracts from maize was even higher than  
56 those induced by soybean (host plant for the tested rhizobia) root extracts (2). In  
57 truth, the LCOs as key molecular recognized by legume host induce root hair  
58 deformation, infection thread formation and further trigger a series of symbiosis-  
59 related gene expression (3). It is likely that this mechanism also contributes to  
60 the observed increase in nodulation of faba bean. Therefore, future studies are  
61 needed to assess whether maize exudates may directly induce the rhizobia to  
62 produce more LCOs and enhance nodulation when interacted with faba bean .

63

64 Genistein, legume-specific isoflavonoids (4, 5), are signature characteristic of  
65 legumes (4, 5) and a key symbiotic signal in the soybean-*Bradyrhizobium*  
66 symbiosis (6, 7). However, Li et al. (1) found that the concentration of genistein

67 in maize root exudates alone was similar to that of faba bean exudates alone (Fig.  
68 S4), which firstly evidenced that that genistein were synthesised by a nonlegume.  
69 This should be confirmed in future studies. Further, genistein was not detected  
70 in root exudates from a mixture of wheat and faba bean, but was present at high  
71 levels in exudates from faba bean alone (Fig. S4) (1), indicating possible  
72 suppression of genistein production by faba bean roots by wheat root exudates.

73

74 Importantly, Li et al. (1) detected high expressions of some key genes of faba  
75 bean root after the addition of root exudates from maize compared to those of  
76 water-treated sample (Fig. 4). Among these genes, *NODL4* and *END93* were  
77 induced in 35-days faba bean root treatment with maize exudates, which was not  
78 consistent with the fact that early nodulin-like proteins have strong expression in  
79 early infection phase and nodule tissue (8). Additionally, *FixI* gene (GenBank no.  
80 KU973547) was described to encode a nitrogen fixation protein of faba bean and  
81 its expression could be detected in all root RNA samples (Fig. 4)(1). However,  
82 *FixI*, known as a member of bacterial fix cluster genes, involved in symbiotic  
83 nitrogen fixation in rhizobia (9) and should not be detected in plant root samples.  
84 To gain insight into the unidentified gene “*FixI*”, we blasted the submitted gene  
85 sequence in NCBI database. The result showed that this “*FixI*” gene has the  
86 highest similarity with an annotated heavy-metal-associated domain protein  
87 mRNA from *Medicago truncatula* (GenBank no. XM\_003626494, 85% gene  
88 sequence identity), which has no genetic and molecular function information  
89 based on the available literature; it may be that this is a false “*FixI*” gene, and  
90 should not be used as an indicator of nitrogen fixation activity in faba bean roots.

91

92 To gain insight into if this false “*FixI*” gene in faba bean may have a function  
93 related to nitrogen fixation when symbiosis with rhizobia, we also analyzed the  
94 expression pattern of gene with most sequence similarity in *M. truncatula*  
95 (XM\_003626494, mentioned above). It showed that the tested gene has highest  
96 expression in leaf compared with other organs and no clear induced-expression  
97 in the root and nodule after inoculation with rhizobia in *M. truncatula* (Fig. 1). It  
98 means the false “*FixI*” gene could not involve in plant nitrogen fixation  
99 regulation.

100

101 It would seem that there are three potential mechanisms by which nodulation  
102 and N<sub>2</sub> fixation can be increased by the root exudates in the legume-cereal  
103 intercropping systems: 1) reduced soil mineral N due to the cereal component, 2)  
104 enhanced interorganismal signalling due to the presence of appropriate  
105 (iso)flavonoids in the cereal root exudates and 3) induced production of  
106 (iso)flavonoid (genistein in the case of faba bean plants) following exposure to  
107 cereal (corn in this case) root exudates, as elucidated in the highly original  
108 findings of Li et al. (1).

109 Overall, the authors should probably collect additional molecular data to support  
110 their hypothesis and the potential contributing mechanisms indicated above  
111 should be noted. Although root exudates from maize may have essential factors  
112 in this facilitative effect, for example, we wait to see how these compounds help  
113 rhizobia to improve nodulation ability and enhance symbiosis of legume-  
114 rhizobium mutualism.

115

116

117

118

119

120

121

122

123

124

125

126

127

128

129

130

131

132

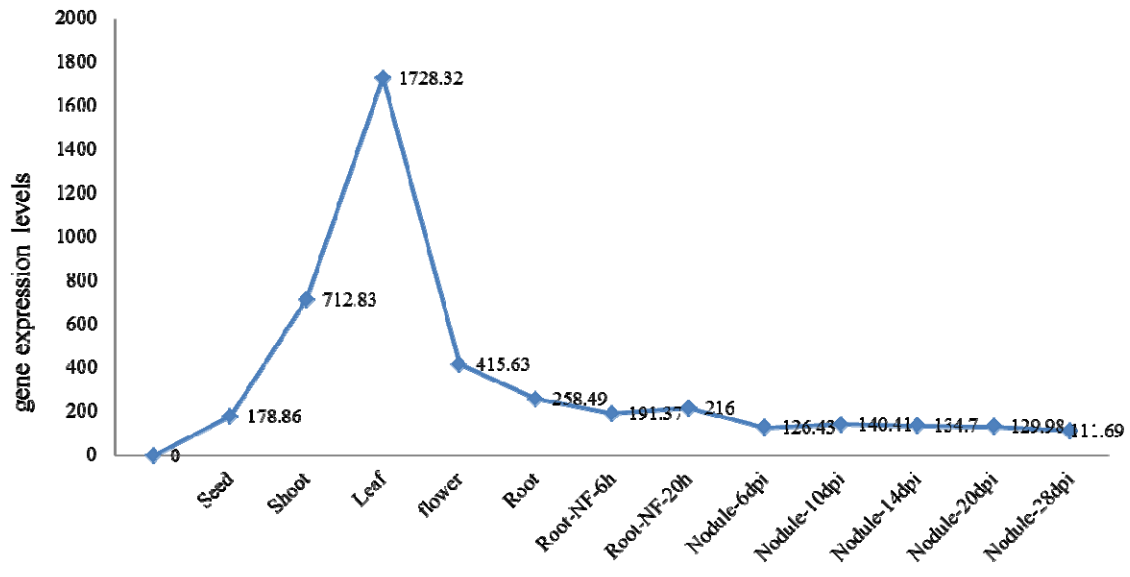

133

134

135 Fig. 1. Expression analysis of an annotated heavy-metal-associated domain  
136 protein in *Medicago truncatula*. All used gene expression data were based on the  
137 Affymetrix GeneChip which server archives all publically-available *M.*  
138 *truncatula* gene expression data ([http://bio info.noble.org/gene-atlas/](http://bio.info.noble.org/gene-atlas/)). NF, nod  
139 factor.

140

141

142

143

144

145

146

147

148

149

150

151

152

153 **References**

154

- 155 1. Li B, *et al.* (2016) Root exudates drive interspecific facilitation by enhancing nodulation and N<sub>2</sub> fixation.  
156 *Proceedings of the National Academy of Sciences*:201523580.
- 157 2. Lian B, Souleimanov A, Zhou X, & Smith DL (2002) In vitro induction of lipo-chitooligosaccharide  
158 production in Bradyrhizobium japonicum cultures by root extracts from non-leguminous plants.  
159 *Microbiological research* 157(3): 157-160.
- 160 3. Geurts R & Bisseling T (2002) Rhizobium Nod factor perception and signalling. *The Plant Cell* 14(suppl  
161 1):S239-S249.
- 162 4. Liu C-W & Murray JD (2016) The Role of Flavonoids in Nodulation Host-Range Specificity: An Update.  
163 *Plants* 5(3):33.
- 164 5. Dixon RA & Ferreira D (2002) Genistein. *Phytochemistry* 60(3):205-211.
- 165 6. Schmidt PE, Broughton WJ, & Werner D (1994) Nod factors of Bradyrhizobium japonicum and  
166 Rhizobium sp. NGR234 induce flavonoid accumulation in soybean root exudate. *MPMI-Molecular Plant  
167 Microbe Interactions* 7(3):384-390.
- 168 7. Kosslak RM, Bookland R, Barkei J, Paaren HE, & Appelbaum ER (1987) Induction of Bradyrhizobium  
169 japonicum common nod genes by isoflavones isolated from Glycine max. *Proceedings of the National  
170 Academy of Sciences* 84(21):7428-7432.
- 171 8. Scheres B, *et al.* (1990) Sequential induction of nodulin gene expression in the developing pea nodule.  
172 *The Plant Cell* 2(8):687-700.
- 173 9. David M, *et al.* (1988) Cascade regulation of nif gene expression in Rhizobium meliloti. *Cell* 54(5):671-  
174 683.

175

176
